# Supplementary material
Source: PubMed Central journal article supplement (PMC3497468)
Supplement: JB.01135-12_zjb999092180so1.pdf [file JB.01135-12_zjb999092180so1.pdf]

## SUPPLEMENTAL INFORMATION

Genetic and biochemical characterizations of enzymes involved in *Streptococcus pneumoniae* serotype 2 capsule synthesis demonstrate that Cps2T (WchF) catalyzes the committed step by addition of  $\beta$ 1-4 rhamnose, the second sugar residue in the repeat unit

David B.A. James and Janet Yother<sup>#</sup>

Department of Microbiology, University of Alabama at Birmingham

Birmingham, Alabama 35294

Running title: Cps2T (WchF) rhamnosyltransferase activity

<sup>#</sup>To whom correspondence should be addressed: Janet Yother, Department of Microbiology, 845 19th St. S., BBRB 661/12, University of Alabama at Birmingham, Birmingham, AL 35294. Tel.: 205-934-9531; Fax: 205-975-6715; E-mail: jyother@uab.edu

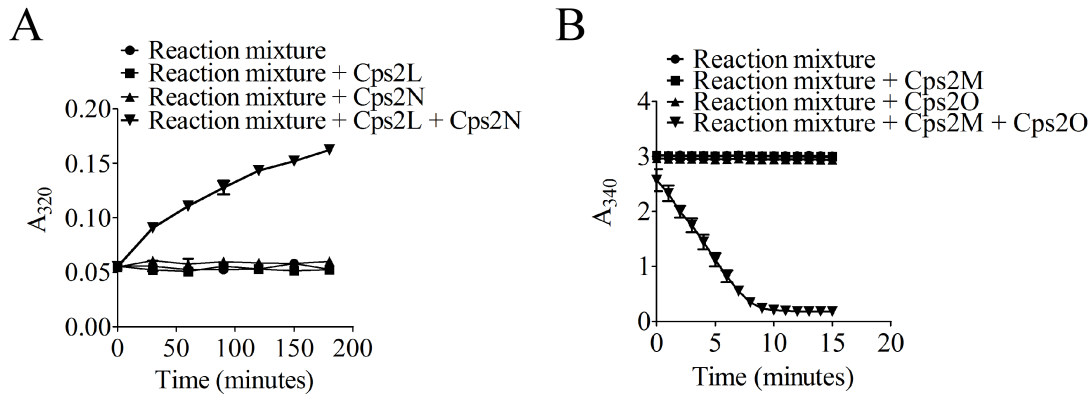

**FIG S1.** Kinetic assays for Cps2N and Cps2O. Assays were performed as described in the Materials and Methods. The reaction mixture for Cps2N activity (A) contained dTTP, Glc-1-P, NAD<sup>+</sup>, and the indicated enzyme(s). Activity was measured as the generation of NADH. The reaction mixture for Cps2O activity (B) contained the Cps2N product, NADH, and the indicated enzyme(s). Activity was measured as the oxidation of NADH. Data points represent means  $\pm$  standard errors from three reactions.

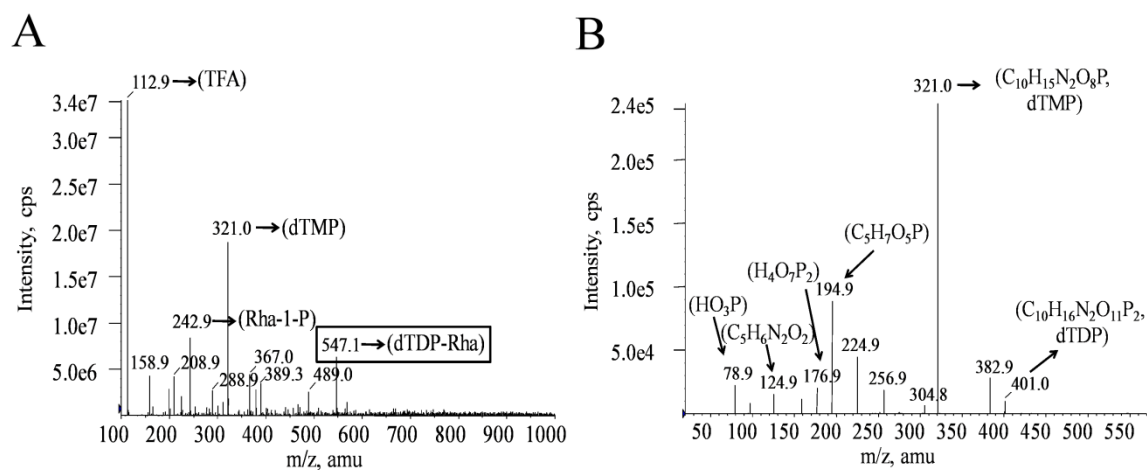

**FIG S2.** ESI-MS/MS of HPLC purified Cps2O product. One  $\mu\text{l}$  of purified dTDP-Rha (approximately 1 mM) was injected by direct infusion into a triple quadrupole mass spectrometer operated under the negative electrospray ionization mode. (A) Precursor ion spectra of the purified Cps2O product (ESI-MS). Ion 547.1 corresponds to dTDP-Rha. (B) The product ion spectra (ESI-MS/MS) of ion 547.1. Product ions indicated are consistent with calculated fragments of dTDP-Rha. Ion intensity is presented as counts per second (cps).

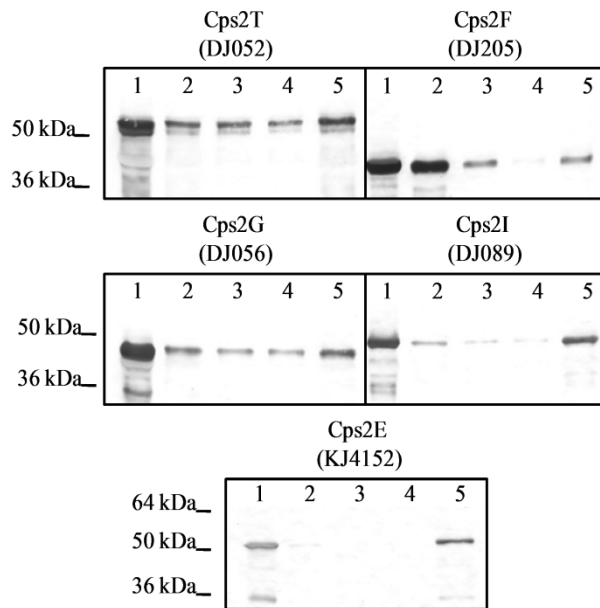

**FIG S3.** Cps2E, Cps2T, Cps2F, Cps2G, and Cps2I membrane association in *E. coli*. Membrane fractions (3  $\mu$ g of total protein) were sequentially washed with 30  $\mu$ l of 100 mM  $\text{Na}_2\text{CO}_3$  (pH 11.5). Lanes: 1, 3  $\mu$ g of total membrane protein from the indicated strains; 2, first wash with 100 mM  $\text{Na}_2\text{CO}_3$  (the entire 30  $\mu$ l was loaded into the gel); 3 and 4, second and third washes with 100 mM  $\text{Na}_2\text{CO}_3$ , respectively; 5, remaining proteins associated with the membrane. Cps2T, Cps2F, Cps2G, and Cps2I blots were probed with  $\alpha$ -Tetra-His; the Cps2E blot was probed with  $\alpha$ -Cps2E.

**TABLE S1.** Additional strains and plasmids used in this study

| Strain(s) or plasmid(s) | Properties <sup>a</sup>                                                                                                                                                                                                                              | References or source |
|-------------------------|------------------------------------------------------------------------------------------------------------------------------------------------------------------------------------------------------------------------------------------------------|----------------------|
| <i>E. coli</i> strains  |                                                                                                                                                                                                                                                      |                      |
| BL21-AI                 | F <sup>-</sup> <i>ompT hsdSB(r<sub>B</sub><sup>-</sup> m<sub>B</sub><sup>-</sup>) gal dcm araB::T7 RNAP-tetA</i>                                                                                                                                     | Invitrogen           |
| DB11                    | <i>met thi gal hasdR nal rif</i>                                                                                                                                                                                                                     | (3)                  |
| DJ005                   | BL21-AI (pDJ005); full length Cps2I; Ap <sup>R</sup>                                                                                                                                                                                                 | This study           |
| DJ009                   | BL21-AI (pDJ009); full length Cps2T; Ap <sup>R</sup>                                                                                                                                                                                                 | This study           |
| DJ011                   | BL21-AI (pDJ011); full length Cps2G; Ap <sup>R</sup>                                                                                                                                                                                                 | This study           |
| DJ014                   | BL21-AI (pDJ014); full length Cps2M with N-terminal-His <sub>6</sub> ; Ap <sup>R</sup>                                                                                                                                                               | This study           |
| DJ015                   | BL21-AI (pDJ015); full length Cps2N with N-terminal-His <sub>6</sub> ; Ap <sup>R</sup>                                                                                                                                                               | This study           |
| DJ016                   | BL21-AI (pDJ016); full length Cps2O with N-terminal-His <sub>6</sub> ; Ap <sup>R</sup>                                                                                                                                                               | This study           |
| DJ017                   | BL21-AI (pDJ017); full length Cps2L with N-terminal-His <sub>6</sub> ; Ap <sup>R</sup>                                                                                                                                                               | This study           |
| DJ052                   | BL21-AI (pDJ052); full length Cps2T with N-terminal-His <sub>6</sub> ; Ap <sup>R</sup>                                                                                                                                                               | This study           |
| DJ056                   | BL21-AI (pDJ056); full length Cps2G with N-terminal-His <sub>6</sub> ; Ap <sup>R</sup>                                                                                                                                                               | This study           |
| DJ078                   | DB11(pDJ078); <i>cps2T</i> deletion construct; Em <sup>R</sup>                                                                                                                                                                                       | This study           |
| DJ086                   | DB11(pDJ086); <i>cps2F</i> deletion construct; Em <sup>R</sup>                                                                                                                                                                                       | This study           |
| DJ089                   | BL21-AI (pDJ089); full length Cps2I with N-terminal-His <sub>6</sub> ; Ap <sup>R</sup>                                                                                                                                                               | This study           |
| DJ131                   | DB11(pDJ131); <i>cps2G</i> deletion construct; Em <sup>R</sup>                                                                                                                                                                                       | This study           |
| DJ184                   | DB11(pDJ184); <i>cps2I</i> deletion construct; Em <sup>R</sup>                                                                                                                                                                                       | This study           |
| DJ192                   | DB11(pDJ192); $\Delta$ <i>cps2T</i> repair construct; Em <sup>R</sup>                                                                                                                                                                                | This study           |
| DJ204                   | BL21-AI (pDJ204); full length Cps2F, replaced GTG start with ATG; Ap <sup>R</sup>                                                                                                                                                                    | This study           |
| DJ205                   | BL21-AI (pDJ205); full length Cps2F, replaced GTG start with ATG, N-terminal-His <sub>6</sub> ; Ap <sup>R</sup>                                                                                                                                      | This study           |
| KJ4152                  | BL21-AI (pKJ4152); full length Cps2E; Ap <sup>R</sup>                                                                                                                                                                                                | This study           |
| RC124                   | BL21-AI (pET-20b); Ap <sup>R</sup>                                                                                                                                                                                                                   | (1)                  |
| Plasmids                |                                                                                                                                                                                                                                                      |                      |
| pCR TOPO 2.1            | PCR cloning vector; Ap <sup>R</sup> Km <sup>R</sup>                                                                                                                                                                                                  | Invitrogen           |
| pDL276                  | <i>aphA-3</i> containing vector; Km <sup>R</sup>                                                                                                                                                                                                     | (2)                  |
| pDJ005                  | pET-20b/ <i>cps2I</i> amplified from D39 using primers I7/I8                                                                                                                                                                                         | This study           |
| pDJ009                  | pET-20b/ <i>cps2T</i> amplified from D39 using primers T13/T14                                                                                                                                                                                       | This study           |
| pDJ011                  | pET-20b/ <i>cps2G</i> amplified from D39 using primers G10/G11                                                                                                                                                                                       | This study           |
| pDJ014                  | pET-16b/ <i>cps2M</i> amplified from D39 using primers M4/M5                                                                                                                                                                                         | This study           |
| pDJ015                  | pET-16b/ <i>cps2N</i> amplified from D39 using primers N4/N5                                                                                                                                                                                         | This study           |
| pDJ016                  | pET-16b/ <i>cps2O</i> amplified from D39 using primers O3/O4                                                                                                                                                                                         | This study           |
| pDJ017                  | pET-16b/ <i>cps2L</i> amplified from D39 using primers L6/L7                                                                                                                                                                                         | This study           |
| pDJ052                  | pET-16b/ <i>cps2T</i> amplified from D39 using primers T13/T14                                                                                                                                                                                       | This study           |
| pDJ056                  | pET-16b/ <i>cps2G</i> amplified from D39 using primers G10/G11                                                                                                                                                                                       | This study           |
| pDJ078                  | pJY4164 containing <i>cps2E</i> (amplified from D39 using primers E54/E55), <i>aphA-3</i> (amplified from pSF151 using primers DJ-01/DJ-02), and <i>cps2F</i> (amplified from D39 using primer T12/F12). Used for <i>cps2T</i> deletion              | This study           |
| pDJ086                  | pJY4164 containing <i>cps2T</i> (amplified from D39 using primers T10/T11), <i>aphA-3</i> (amplified from pSF151 using primers DJ-01/DJ-02), and <i>cps2G</i> (amplified from D39 using primers F7/G8). Used for <i>cps2F</i> deletion               | This study           |
| pDJ089                  | pET-16b/ <i>cps2I</i> amplified from D39 using primers I6/I8                                                                                                                                                                                         | This study           |
| pDJ131                  | pJY4164 containing <i>cps2F</i> (amplified from D39 using primers F8/F9), <i>aphA-3</i> (amplified from pSF151 using primers DJ-01/DJ-02), and <i>cps2H</i> (amplified from D39 chromosomal DNA using primer G9/H7). Used for <i>cps2G</i> deletion. | This study           |
| pDJ184                  | pJY4164 containing <i>cps2H</i> (amplified from D39 using primers H8/F9), <i>aphA-3</i> (amplified from pSF151 using primers DJ-01/DJ-02), and <i>cps2J</i> (amplified from D39 chromosomal DNA using primer I9/J9). Used for <i>cps2I</i> deletion. | This study           |
| pDJ192                  | pJY4164/ <i>cps2ETF</i> amplified from D39 using primers E8/F12. Used to repair $\Delta$ <i>cps2T</i> mutants.                                                                                                                                       | This study           |
| pDJ204                  | pET-20b/ <i>cps2F</i> amplified from D39 using primers F10/F12. GTG start codon changed to ATG.                                                                                                                                                      | This study           |
| pDJ205                  | pET-16b/ <i>cps2F</i> amplified from D39 using primers F10/F12. GTG start codon changed to ATG.                                                                                                                                                      | This study           |
| pET16b                  | Protein expression vector, Ap <sup>R</sup>                                                                                                                                                                                                           | Novagen              |
| pET20b                  | Protein expression vector, Ap <sup>R</sup>                                                                                                                                                                                                           | Novagen              |
| pJY4164                 | <i>S. pneumoniae</i> suicide vector; Em <sup>R</sup>                                                                                                                                                                                                 | (5)                  |
| pKJ4152                 | pET-20b/ <i>cps2E</i> amplified from D39 using primers E8/E11.                                                                                                                                                                                       | This study           |
| pSF151                  | Streptococcal shuttle vector, derivative of pDL276                                                                                                                                                                                                   | (4)                  |

<sup>a</sup>Km<sup>R</sup>, kanamycin resistant; Ap<sup>R</sup>, ampicillin resistant; Em<sup>R</sup>, erythromycin resistant.

**TABLE S2.** Primers used in this study

| Primer <sup>a</sup> | Sequence <sup>b</sup>                                        | Description <sup>c</sup>            |
|---------------------|--------------------------------------------------------------|-------------------------------------|
| E8 (+)              | <i>cat</i> ATGAATGGAAAAACAGTAAAGTC                           | <i>cps2E</i> <sup>5046-5068</sup>   |
| E11 (-)             | <i>ctcgag</i> CTACTTCGCTCCATCTCTC                            | <i>cps2E</i> <sup>6414-6395</sup>   |
| E54 (+)             | <i>gcg</i> <i>cggtacc</i> ATGAATGGAAAAACAGTAAAGTCTTC         | <i>cps2E</i> <sup>5046-5071</sup>   |
| E55 (-)             | <i>gcg</i> <i>cgcgccgc</i> CTACTTCGCTCCATCTCTCATAAATAC       | <i>cps2E</i> <sup>6413-6384</sup>   |
| F7 (+)              | <i>gcg</i> <i>cctcgag</i> GTGTGGTGCAAGTAATCGGTG              | <i>cps2F</i> <sup>8529-8549</sup>   |
| F8 (+)              | <i>gcg</i> <i>cggtaccg</i> TGAGTAACAAGCAAATTGCGATTATG        | <i>cps2F</i> <sup>7622-7648</sup>   |
| F9 (-)              | <i>gcg</i> <i>cgcgccgc</i> CTAAATAAACATTAACCTCACCGATTACTTGC  | <i>cps2F</i> <sup>8566-8536</sup>   |
| F10 (+)             | <i>cata</i> TGAGTAACAAGCAAATTGCGATT                          | <i>cps2F</i> <sup>7623-7648</sup>   |
| F12 (-)             | <i>gcg</i> <i>cggtacc</i> CTAAATAAACATTAACCTCACCGATTACTTGC   | <i>cps2F</i> <sup>8566-8536</sup>   |
| G8 (-)              | <i>gcg</i> <i>cggtacc</i> CTATTTACCGTTTTCAATATATACCCC        | <i>cps2G</i> <sup>9628-9602</sup>   |
| G9 (+)              | <i>gcg</i> <i>cctcgag</i> GGGGTATATATTGAAAACGGTAAATAG        | <i>cps2G</i> <sup>9602-9628</sup>   |
| G10 (+)             | <i>cat</i> ATGAAAATTAATTTTATCCTTCCATTAAAG                    | <i>cps2G</i> <sup>8582-8611</sup>   |
| G11 (-)             | <i>gaattc</i> CTATTTACCGTTTTCAATATATACCCC                    | <i>cps2G</i> <sup>9628-9602</sup>   |
| H7 (-)              | <i>gcg</i> <i>cggtacc</i> TTATTTTCTTGCTTAGTCAATCTCATTC       | <i>cps2H</i> <sup>10832-10804</sup> |
| H8 (-)              | <i>gcg</i> <i>cgcgccgc</i> TTATTTTCTTGCTTAGTCAATCTCATTC      | <i>cps2H</i> <sup>10832-10804</sup> |
| H9 (+)              | <i>gcg</i> <i>cggtacc</i> ATGCTCTCTATATACAGGAAATGGTG         | <i>cps2H</i> <sup>9669-9696</sup>   |
| I6 (+)              | <i>ctcgag</i> ATGACAAAAAGTATCTTATATTTTTTATCTACATC            | <i>cps2I</i> <sup>10962-10985</sup> |
| I7 (+)              | <i>cat</i> ATGACAAAAAGTATCTTATATTTTTTATCTACATC               | <i>cps2I</i> <sup>10962-10996</sup> |
| I8 (-)              | <i>gaattc</i> TCAATTTTCTAGTTCCTTATATAGTTGCATG                | <i>cps2I</i> <sup>12119-12089</sup> |
| I9 (+)              | <i>gcg</i> <i>cctcgag</i> GATAAAAATAATGCCATGCAGATCATG        | <i>cps2I</i> <sup>12066-12083</sup> |
| J8 (-)              | <i>ggatcc</i> TCAATTTTCTAGTTCCTTATATAGTTGCATG                | <i>cps2J</i> <sup>12117-12088</sup> |
| J9 (-)              | <i>gcg</i> <i>cggtacc</i> TTATGTTAGAACTTTTTTAATTCACCAATAATAC | <i>cps2J</i> <sup>13525-13491</sup> |
| L6 (+)              | <i>cat</i> ATGAAAGGTATTATTCTTGCGGGTG                         | <i>cps2L</i> <sup>13510-13534</sup> |
| L7 (-)              | <i>gctaagc</i> CTAGACTTCTCCAATCAAACGGAGC                     | <i>cps2L</i> <sup>16389-16359</sup> |
| M4 (+)              | <i>cat</i> ATGACAGATAATTTTTTCGGAAAAATAC                      | <i>cps2M</i> <sup>16380-16407</sup> |
| M5 (-)              | <i>ggaicc</i> TTACAAATCTTCTTTTTTCAAAGGTTTAC                  | <i>cps2M</i> <sup>16973-16944</sup> |
| N4 (+)              | <i>cat</i> ATGACTGAATACAAAAATATTATCGTGAC                     | <i>cps2N</i> <sup>16985-17014</sup> |
| N5 (-)              | <i>ggaicc</i> TTATACTGTAATAATCTCCTGAGTCTTAGC                 | <i>cps2N</i> <sup>18035-18006</sup> |
| O3 (-)              | <i>ctcgag</i> TTATCTCACTTCTGTTTGTAATAATCTTG                  | <i>cps2O</i> <sup>18952-18923</sup> |
| O4 (+)              | <i>cat</i> ATGATTTTAATTACAGGGGCAAATG                         | <i>cps2O</i> <sup>18101-18125</sup> |
| T10 (+)             | <i>gcg</i> <i>cggtacc</i> ATGAAGAAGTCAGTTTATATCATTGGTTC      | <i>cps2T</i> <sup>6445-6473</sup>   |
| T11 (-)             | <i>gcg</i> <i>cgcgccgc</i> TTACTCACTTTTTCCCCCTTCAAAC         | <i>cps2T</i> <sup>7629-7605</sup>   |
| T12 (+)             | <i>gcg</i> <i>cctcgag</i> GAAGAGATAGTGGTGGATTATGAGGAAG       | <i>cps2T</i> <sup>7576-7603</sup>   |
| T13 (+)             | <i>cat</i> ATGAAGAAGTCAGTTTATATCATTGGTTC                     | <i>cps2T</i> <sup>6445-6473</sup>   |
| T14 (-)             | <i>ctcgag</i> TTACTCACTTTTTCCCCCTTCAAAC                      | <i>cps2T</i> <sup>7629-7605</sup>   |
| DJ-01 (+)           | <i>gcg</i> <i>cgcgccgc</i> GAGGAAGGAAATAATAA                 | <i>aphA-3</i> <sup>1729-1746</sup>  |
| DJ-02 (-)           | <i>gcg</i> <i>cctcgag</i> GTAATAACAATTCATCCA                 | <i>aphA-3</i> <sup>2543-2523</sup>  |

<sup>a</sup> Forward and reverse primers are indicated by + and -, respectively.

<sup>b</sup> Lower case letters indicate restriction enzyme sites inserted for digestion. Restriction enzyme sites are italicized.

<sup>c</sup> Superscripts indicate the start and end positions of the primers in the type 2 D39 capsule locus. (GenBank accession no. AF026471) and pDL276 *aphA-3* (GenBank accession no. AF216803)

**TABLE S3.** Frequencies of acquiring deletion mutations

Recipients were the D39 parent and the D39 derivative BX515, which contains a *cps2E* point mutation

| Mutation         | Exp # <sup>b</sup> | Transformant Frequency <sup>a</sup>           |                                                            |
|------------------|--------------------|-----------------------------------------------|------------------------------------------------------------|
|                  |                    | D39                                           | BX515                                                      |
| $\Delta cps2T^c$ | 1                  | 290/116,000 ( $2.5 \times 10^{-3}$ )          | 410/25,000 ( $1.6 \times 10^{-2}$ )                        |
|                  | 2                  | 710/34,000 ( $2.1 \times 10^{-2}$ )           | 380/48,000 ( $7.9 \times 10^{-3}$ )                        |
|                  | mean               | $1.2 \times 10^{-2}$ ( $9.2 \times 10^{-3}$ ) | $1.2 \times 10^{-2}$ ( $4.2 \times 10^{-3}$ )              |
| $\Delta cps2F^c$ | 1                  | 280/92,000 ( $3.0 \times 10^{-3}$ )           | 74/27,000 ( $2.7 \times 10^{-3}$ )                         |
|                  | 2                  | 270/51,000 ( $5.3 \times 10^{-3}$ )           | 64/22,000 ( $2.9 \times 10^{-3}$ )                         |
|                  | mean               | $4.2 \times 10^{-3}$ ( $1.1 \times 10^{-3}$ ) | $2.8 \times 10^{-3}$ ( $8.4 \times 10^{-5}$ )              |
| $\Delta cps2G^c$ | 1                  | 3/90,000 ( $3.3 \times 10^{-5}$ )             | 54/26,000 ( $2.1 \times 10^{-3}$ )                         |
|                  | 2                  | 2/64,000 ( $3.1 \times 10^{-5}$ )             | 79/25,000 ( $3.2 \times 10^{-3}$ )                         |
|                  | mean               | $3.2 \times 10^{-5}$ ( $1.0 \times 10^{-6}$ ) | $2.6 \times 10^{-3}$ ( $5.4 \times 10^{-4}$ ) <sup>d</sup> |
| $\Delta cps2I^c$ | 1                  | 4/87,000 ( $4.6 \times 10^{-5}$ )             | 7/25,000 ( $2.8 \times 10^{-4}$ )                          |
|                  | 2                  | 1/88,000 ( $1.1 \times 10^{-5}$ )             | 11/32,000 ( $3.4 \times 10^{-4}$ )                         |
|                  | mean               | $2.9 \times 10^{-5}$ ( $1.7 \times 10^{-5}$ ) | $3.1 \times 10^{-4}$ ( $3.2 \times 10^{-5}$ ) <sup>d</sup> |

<sup>a</sup> within each mutation group, data above the line are the number of antibiotic resistant CFU/total CFU for two independent experiments, with the calculated frequencies shown in parentheses. The data below the lines are the means of the frequencies from the two experiments, with  $\pm$  standard errors shown in parentheses.

<sup>b</sup> experiment number for two independent experiments using different batches of competent *S. pneumoniae* and different preparations of donor DNA.

<sup>c</sup> donor DNAs used for deletions were obtained from *E. coli* constructs indicated in Table S1.

<sup>d</sup> significantly different ( $P < 0.05$ ) from D39, as determined using a two-tailed unpaired Student *t*-test.

## SUPPLEMENTAL REFERENCES

1. **Cartee, R. T., W. T. Forsee, M. H. Bender, K. D. Ambrose, and J. Yother.** 2005. CpsE from type 2 *Streptococcus pneumoniae* catalyzes the reversible addition of glucose-1-phosphate to a polyprenyl phosphate acceptor, initiating type 2 capsule repeat unit formation. *J Bacteriol* **187**:7425-33.
2. **Dunny, G. M., L. N. Lee, and D. J. LeBlanc.** 1991. Improved electroporation and cloning vector system for gram-positive bacteria. *Appl Environ Microbiol* **57**:1194-201.
3. **Macrina, F. L., J. A. Tobian, K. R. Jones, R. P. Evans, and D. B. Clewell.** 1982. A cloning vector able to replicate in *Escherichia coli* and *Streptococcus sanguis*. *Gene* **19**:345-53.
4. **Tao, L., D. J. LeBlanc, and J. J. Ferretti.** 1992. Novel streptococcal-integration shuttle vectors for gene cloning and inactivation. *Gene* **120**:105-10.
5. **Yother, J., G. L. Handsome, and D. E. Briles.** 1992. Truncated forms of PspA that are secreted from *Streptococcus pneumoniae* and their use in functional studies and cloning of the *pspA* gene. *J Bacteriol* **174**:610-8.
